# Supplementary material for: Variation in the Structure and Composition of Bacterial Communities within Drinking Water Fountains in Melbourne, Australia
Source: MDPI journal article supplement (doi:10.3390/w14060908), 2022-03-14
Supplement: s1 [file s1]

## Supplementary Data

**Table S.1** - Precise locations of drinking water fountains

| <b>Fountain No.1</b> | <b>Longitude</b> | <b>Latitude</b> |
|----------------------|------------------|-----------------|
| 1                    | 37°48'31.4"S     | 144°56'41.7"E   |
| 2                    | 37°48'25.6"S     | 144°57'05.1"E   |
| 3                    | 37°48'24.9"S     | 144°57'21.4"E   |
| 4                    | 37°48'15.9"S     | 144°57'48.3"E   |
| 5                    | 37°48'12.0"S     | 144°57'58.9"E   |
| 6                    | 37°48'08.5"S     | 144°58'18.8"E   |
| 7                    | 37°48'26.3"S     | 144°58'22.2"E   |
| 8                    | 37°48'36.9"S     | 144°58'20.7"E   |
| 9                    | 37°48'43.2"S     | 144°58'14.8"E   |
| 10                   | 37°48'58.9"S     | 144°58'01.0"E   |
| 11                   | 37°49'00.4"S     | 144°58'09.9"E   |
| 12                   | 37°49'06.4"S     | 144°58'26.1"E   |

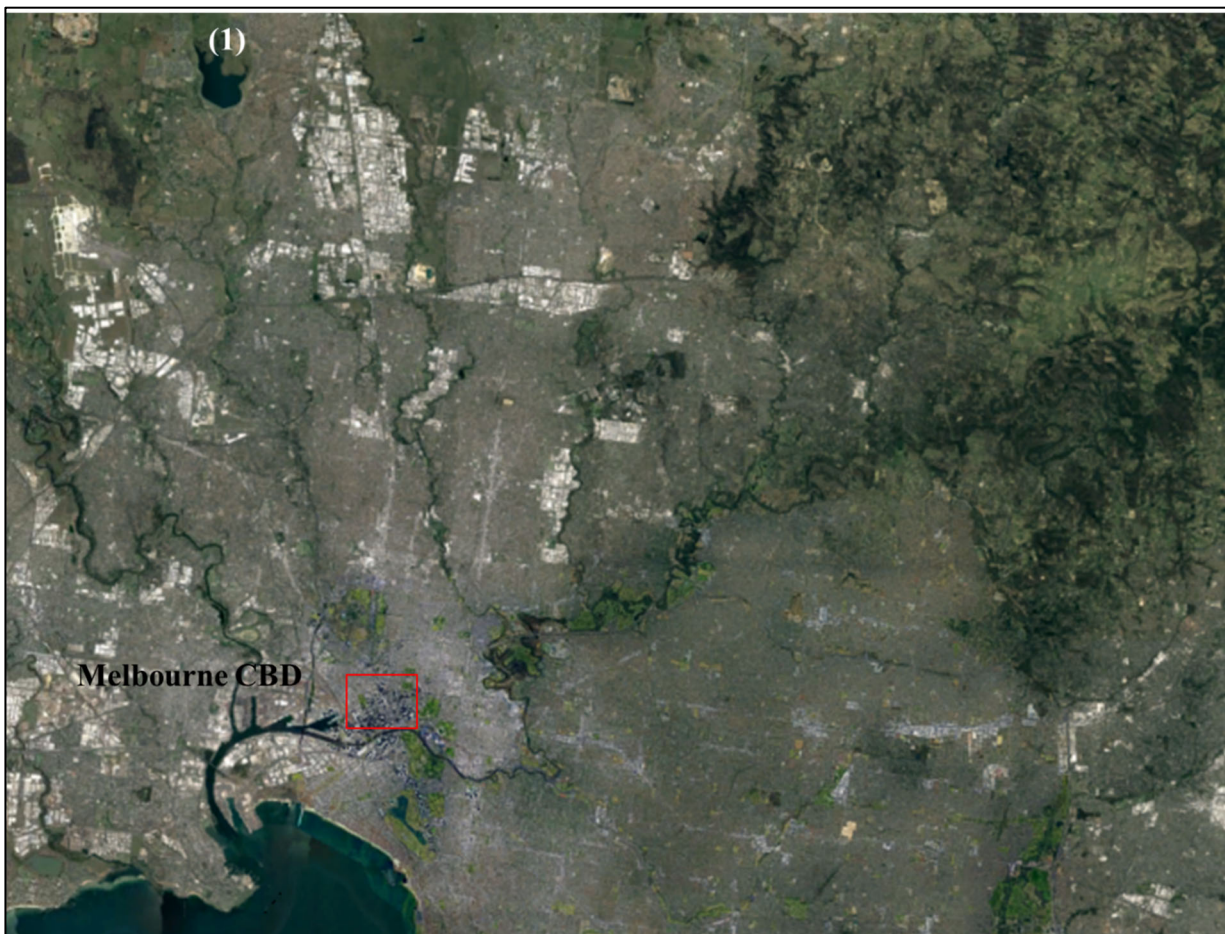

**Figure S1** – Reservoirs supplying water to City West Water customers; (1) Greenvale, (2) Sugarloaf and (3) Silvan. \* - Winneke treatment plant. Red box indicates sampling area within Melbourne Central Business District (Google Earth, 2020).

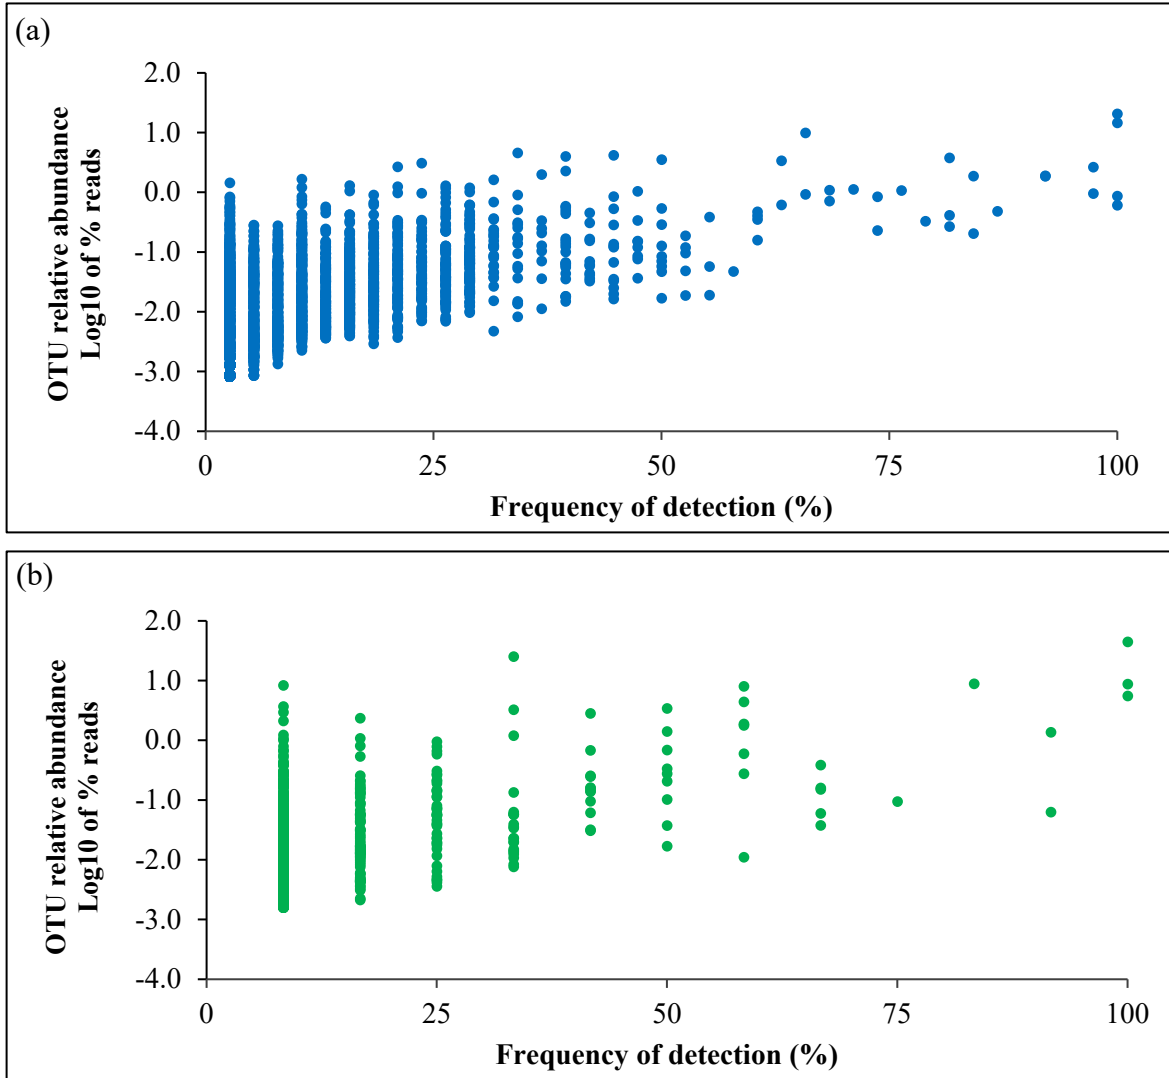

**Figure S2** – Frequency of detection and relative abundance of OTUs in (a) drinking water (n=38) and (b) biofilms (n = 12) in drinking water fountains.

Water

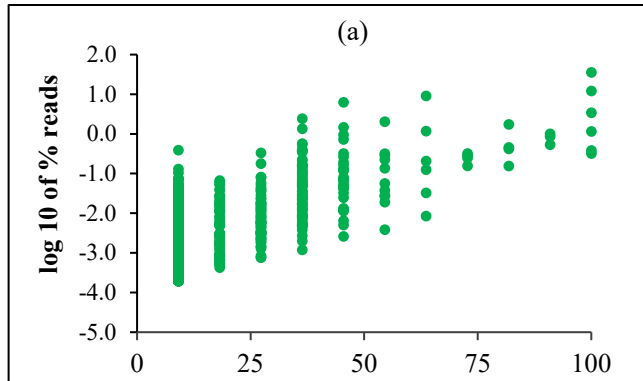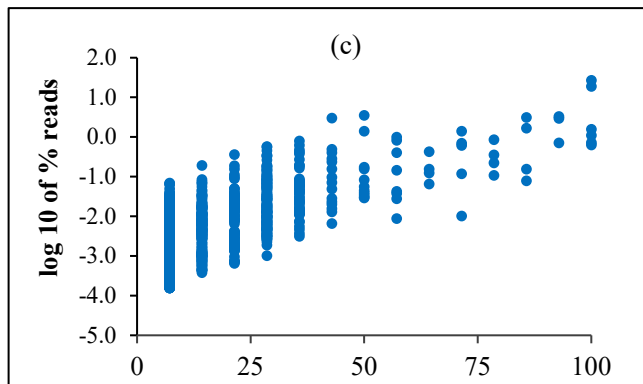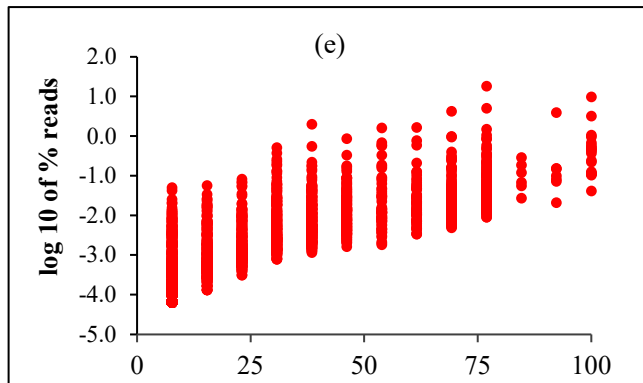

Biofilm

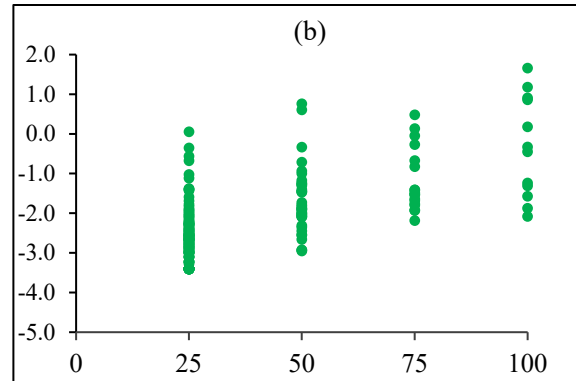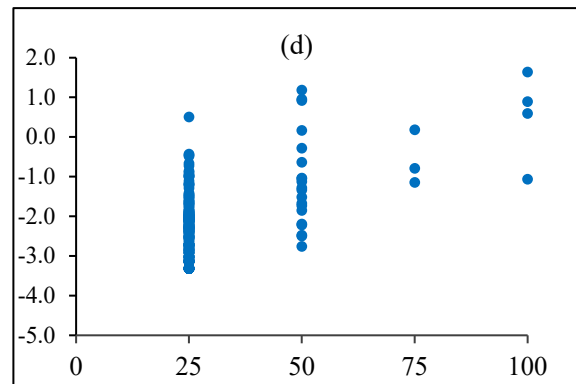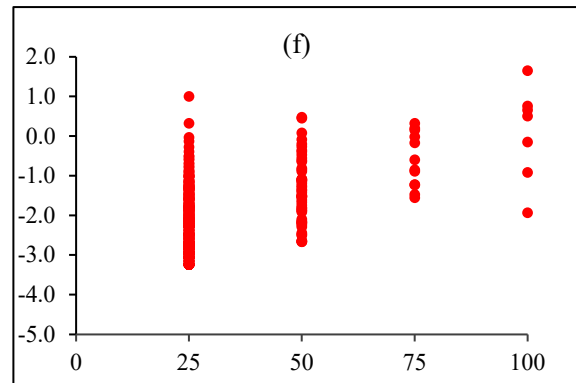

**Figure S3** – Frequency of detection and relative abundance of OTUs in drinking water (n= 38) and biofilms (n = 12) across fountain types; A (green), B (blue) and C (red). Water samples are (a), (c) and (e) and biofilm samples are (b), (d) and (f).
